# Supplementary material for: CeO2-modified α-MoO3 nanorods as a synergistic support for Pt nanoparticles with enhanced COads tolerance during methanol oxidation
Source: Royal Society of Chemistry journal article supplement (doi:10.1039/c6cp07005a), 2016-11-15
Supplement: c6cp07005a1.pdf [file c6cp07005a1.pdf]

**Electronic Supplementary Information**

**CeO<sub>2</sub>-Modified  $\alpha$ -MoO<sub>3</sub> Nanorods as a Synergistic Support for Pt Nanoparticles  
with Enhanced CO<sub>ads</sub> Tolerance during Methanol Oxidation**

Yanying Liu<sup>a</sup>, Chuntao Liu<sup>a,\*</sup>, Xuefeng Yu<sup>a</sup>, Hannah Osgood,<sup>b</sup> and Gang Wu<sup>b,\*</sup>

<sup>a</sup>School of Chemistry and Materials Science, Heilongjiang University, Harbin

150080, China

<sup>b</sup> Department of Chemical and Biological Engineering, University at Buffalo, the

State University of New York, Buffalo, NY 14260, United States

**Corresponding Authors:**

\*E-mail: [liu\\_chuntao@163.com](mailto:liu_chuntao@163.com) (C. Liu) and [gangwu@buffalo.edu](mailto:gangwu@buffalo.edu) (G. Wu)

**Table S1.** Binding energies and surface compositions from deconvolution of XPS spectra for Pt 4f in the core level region of Pt/Ce<sub>0.2</sub>Mo<sub>0.8</sub>O<sub>3-δ</sub>, Pt/MoO<sub>3</sub> and Pt/C catalysts.

|                                                         | Pt (0)              |                    | Pt (II)             |                    | Pt (IV)             |                    |
|---------------------------------------------------------|---------------------|--------------------|---------------------|--------------------|---------------------|--------------------|
|                                                         | Binding energy (eV) | Relative ratio (%) | Binding energy (eV) | Relative ratio (%) | Binding energy (eV) | Relative ratio (%) |
| Pt/Ce <sub>0.2</sub> Mo <sub>0.8</sub> O <sub>3-δ</sub> | 71.9                | 63.6               | 73.3                | 15.7               | 75.1                | 20.7               |
|                                                         | 75.3                |                    | 76.7                |                    | 78.5                |                    |
| Pt/MoO <sub>3</sub>                                     | 71.9                | 59.6               | 73.1                | 20.7               | 74.9                | 19.7               |
|                                                         | 75.2                |                    | 76.4                |                    | 78.3                |                    |
| Pt/C                                                    | 71.5                | 52.7               | 72.4                | 18.2               | 74.6                | 29.1               |
|                                                         | 74.9                |                    | 75.7                |                    | 77.9                |                    |

**Table S2.** Binding energies and surface compositions from deconvolution of XPS spectra for Ce 3d and Mo 3d at the core level region of catalysts.

| Sample                                                  | Ce 3d    |                     |                    | Mo 3d   |                     |                    |
|---------------------------------------------------------|----------|---------------------|--------------------|---------|---------------------|--------------------|
|                                                         | Species  | Binding energy (eV) | Relative ratio (%) | Species | Binding energy (eV) | Relative ratio (%) |
| Pt/Ce <sub>0.2</sub> Mo <sub>0.8</sub> O <sub>3-δ</sub> | Ce (IV)  | 882.4               | 57.7               | Mo (VI) | 233.0               | 81.7               |
|                                                         | Ce (IV)  | 898.7               |                    | Mo (VI) | 236.1               |                    |
|                                                         | Ce (IV)  | 900.7               |                    | Mo (V)  | 231.5               | 18.3               |
|                                                         | Ce (IV)  | 917.0               |                    | Mo (V)  | 234.6               |                    |
|                                                         | Ce (III) | 886.1               | 42.3               |         |                     |                    |
| Pt/MoO <sub>3</sub>                                     | Ce (III) | 904.4               |                    | Mo (VI) | 232.8               | 85.7               |
|                                                         |          |                     |                    | Mo (VI) | 235.9               |                    |
|                                                         |          |                     |                    | Mo (V)  | 231.4               | 14.3               |
|                                                         |          |                     |                    | Mo (V)  | 234.6               |                    |

**Table S3.** Electrochemical characterizations for Pt/Ce<sub>0.2</sub>Mo<sub>0.8</sub>O<sub>3-δ</sub>, Pt/MoO<sub>3</sub>, and commercial Pt/C catalysts.

| Sample                                                  | Onset potentials <sup>a</sup> (mV) | Peak potentials <sup>a</sup> (mV) | Onset potentials <sup>b</sup> (mV) | Mass activity(mA mg Pt <sup>-1</sup> ) <sup>b</sup> (mV) |
|---------------------------------------------------------|------------------------------------|-----------------------------------|------------------------------------|----------------------------------------------------------|
| Pt/Ce <sub>0.2</sub> Mo <sub>0.8</sub> O <sub>3-δ</sub> | 520                                | 817                               | 403                                | 585                                                      |
| Pt/MoO <sub>3</sub>                                     | 580                                | 824                               | 478                                | 442                                                      |
| Pt/C                                                    | 735                                | 869                               | 510                                | 353                                                      |

<sup>a</sup> Obtained from Fig. 8; <sup>b</sup> Obtained from Fig. 9.

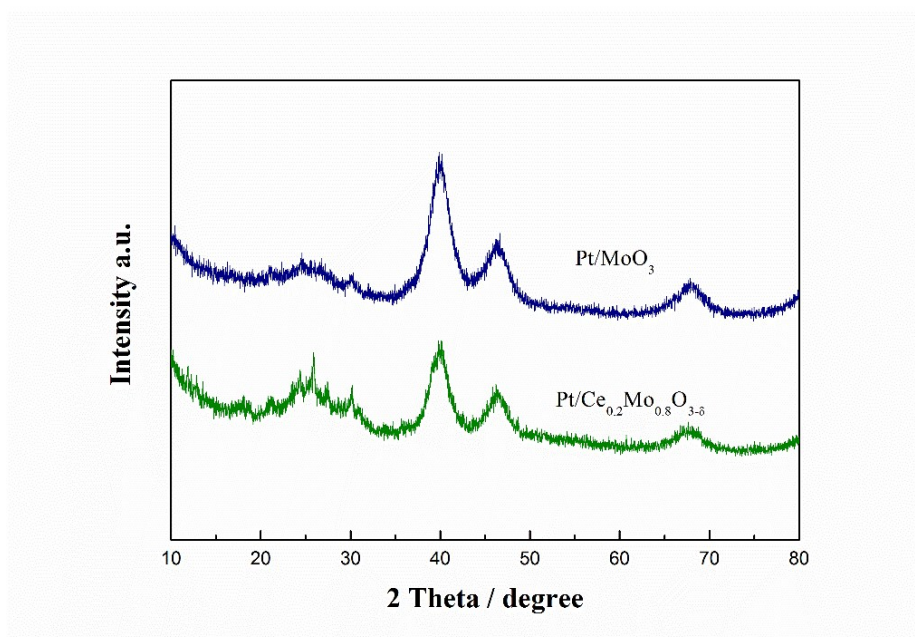

**Fig. S1** XRD patterns of Pt/Ce<sub>0.2</sub>Mo<sub>0.8</sub>O<sub>3-δ</sub> and Pt/MoO<sub>3</sub> catalysts.

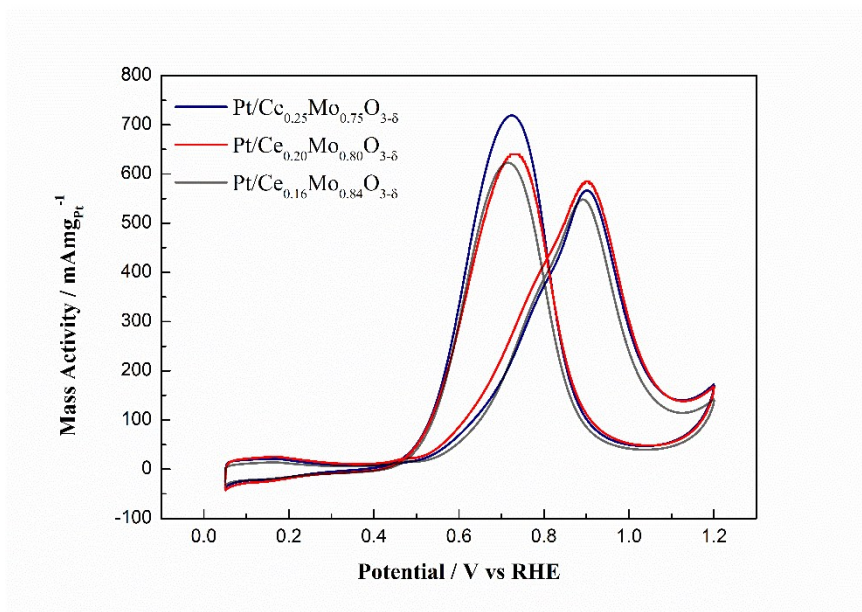

**Fig. S2** CV curves of Pt supported on Ce-doped  $\text{MoO}_3$  with different ratios of Ce:Mo in  $0.5 \text{ mol L}^{-1} \text{H}_2\text{SO}_4 + 0.5 \text{ mol L}^{-1} \text{CH}_3\text{OH}$ .

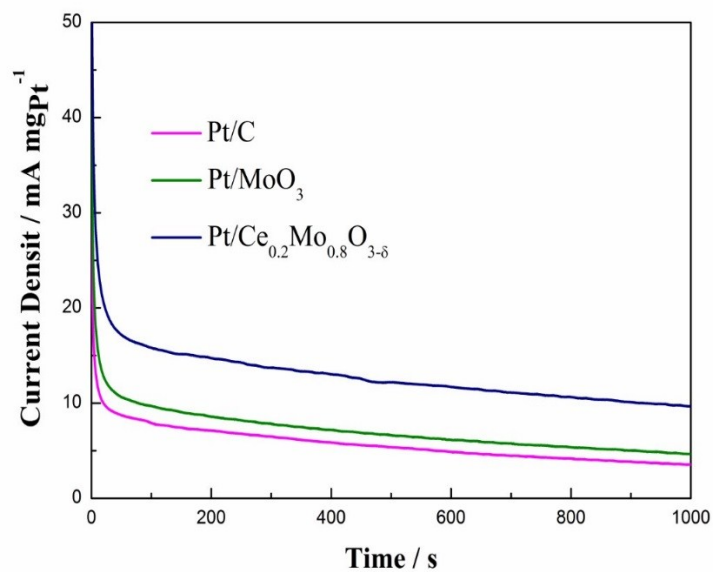

**Fig. S3** CA curves of  $\text{Pt/Ce}_{0.2}\text{Mo}_{0.8}\text{O}_{3-\delta}$ ,  $\text{Pt/MoO}_3$  and commercial  $\text{Pt/C}$  catalysts at 0.6 V for 1000 s in  $0.5 \text{ mol L}^{-1} \text{H}_2\text{SO}_4 + 0.5 \text{ mol L}^{-1} \text{CH}_3\text{OH}$ .

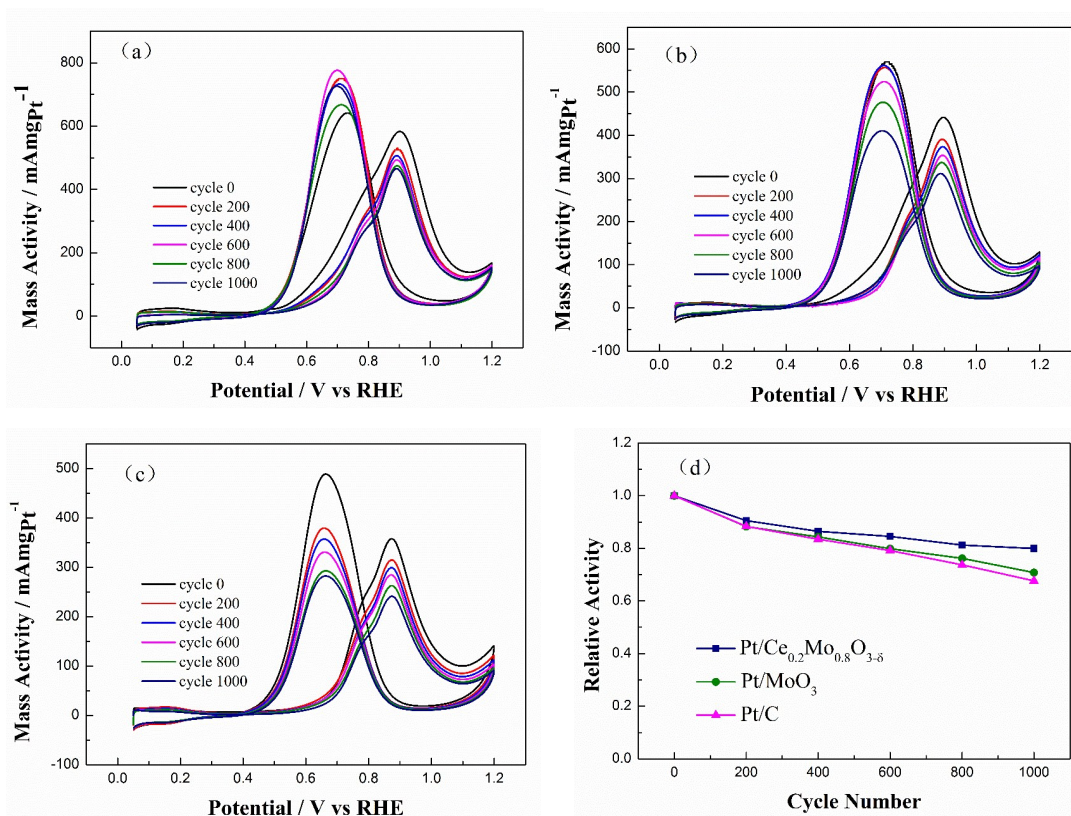

**Fig. S4** Continued voltammetry cycles of (a) Pt/Ce<sub>0.2</sub>Mo<sub>0.8</sub>O<sub>3-δ</sub>, (b) Pt/MoO<sub>3</sub> and (c) commercial Pt/C catalysts in 0.5 mol L<sup>-1</sup> H<sub>2</sub>SO<sub>4</sub> at 25 °C. (d) Relative activity of the three catalysts based on cycle number during stability testing.

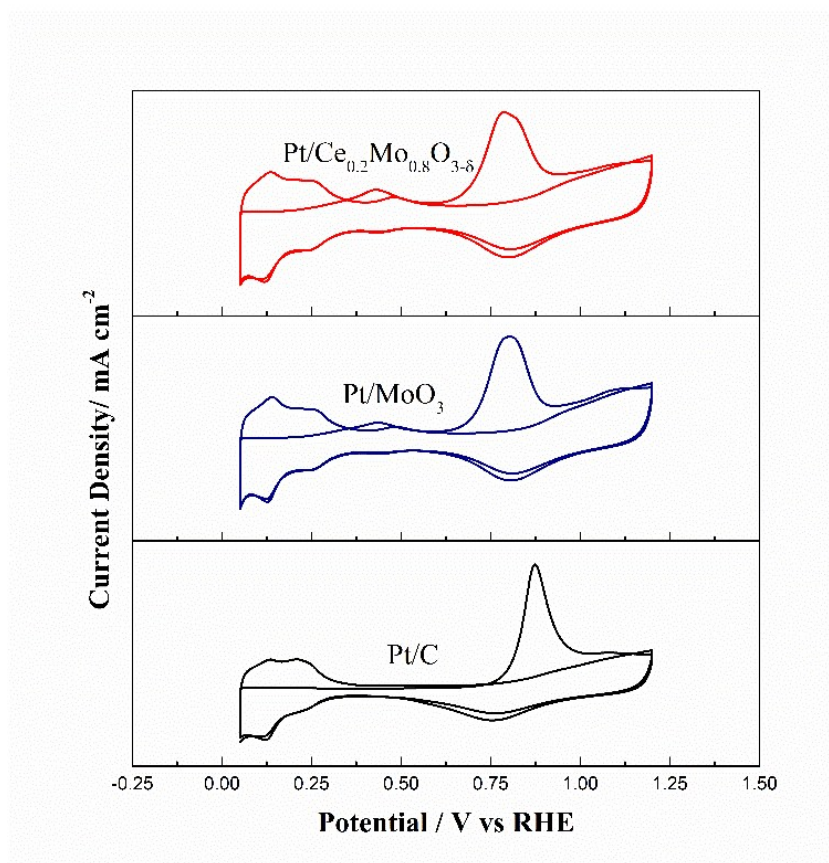

**Fig. S5** CO stripping voltammogram for (a) commercial Pt/C, (b) Pt/MoO<sub>3</sub> and (c) Pt/Ce<sub>0.2</sub>Mo<sub>0.8</sub>O<sub>3-δ</sub> catalysts after accelerated aging tests.

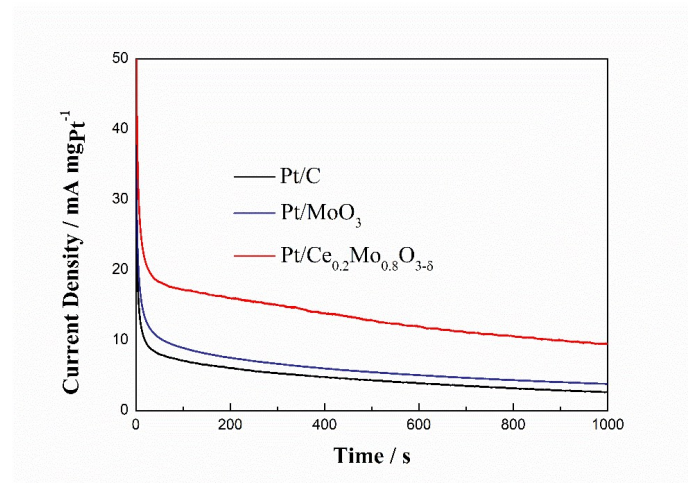

**Fig. S6** CA curves of Pt/Ce<sub>0.2</sub>Mo<sub>0.8</sub>O<sub>3-δ</sub>, Pt/MoO<sub>3</sub> and commercial Pt/C catalysts at 0.6 V for 1000 s after accelerated aging tests in 0.5 mol L<sup>-1</sup> H<sub>2</sub>SO<sub>4</sub> + 0.5 mol L<sup>-1</sup> CH<sub>3</sub>OH.

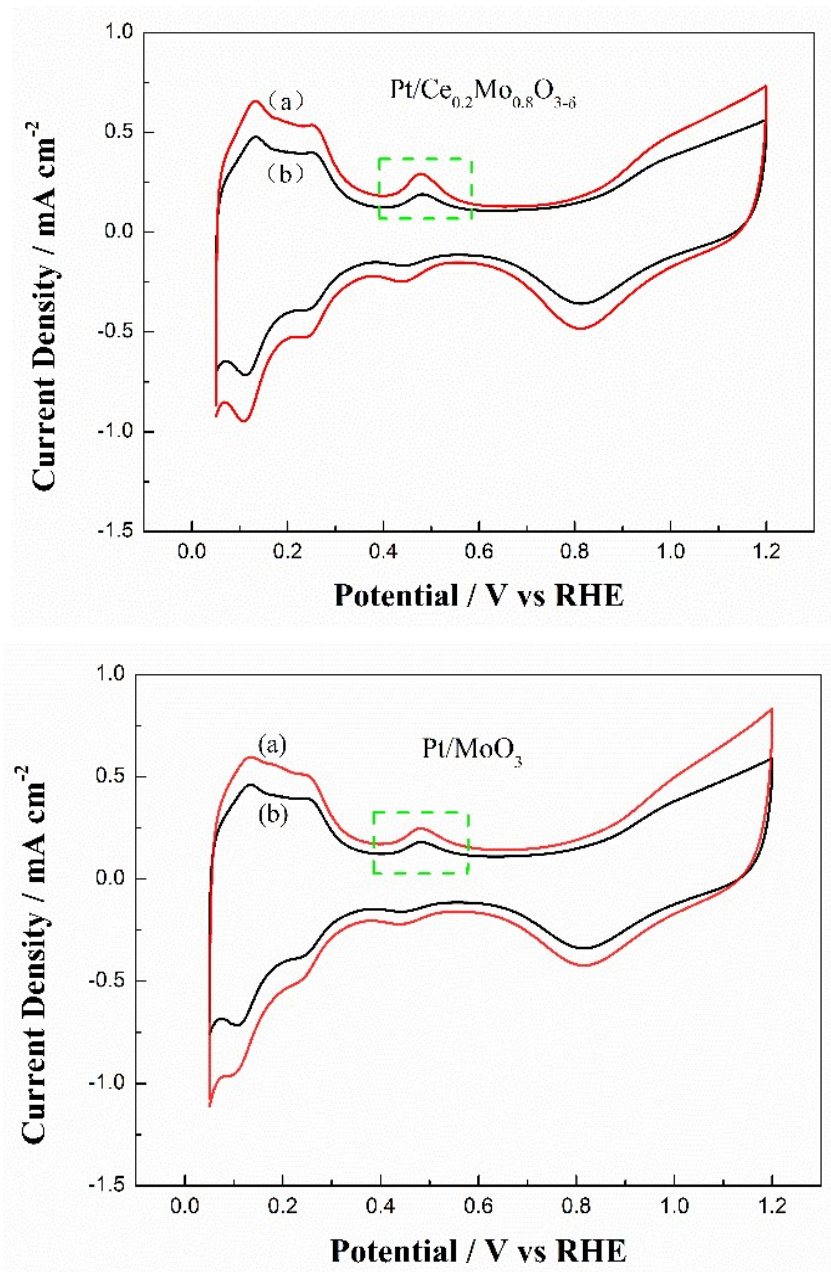

**Fig. S7.** CV comparisons of Pt/Ce<sub>0.2</sub>Mo<sub>0.8</sub>O<sub>3-δ</sub> and Pt/MoO<sub>3</sub> catalysts in 0.5 mol L<sup>-1</sup> H<sub>2</sub>SO<sub>4</sub> solution before (a) and after ASTs (b).
